# Supplementary material
Source: MDPI journal article supplement (https://www.mdpi.com/2673-4079/3/2/13)
Supplement: s1 [file s1]

## Supporting Information

# Green Synthesis of *De Novo* Bioinspired Porous Iron-Tannate Microstructures with Amphoteric Surface Properties

Hemali Rathnayake,<sup>\*a</sup> Sheeba Dawood, Gayani Pathiraja, Kelvin Adrah, and Olubunmi Ayodele

Department of Nanoscience, Joint School of Nanoscience and Nanoengineering, University of North Carolina at Greensboro, 2907 East Gate City Blvd, Greensboro, NC 27401.

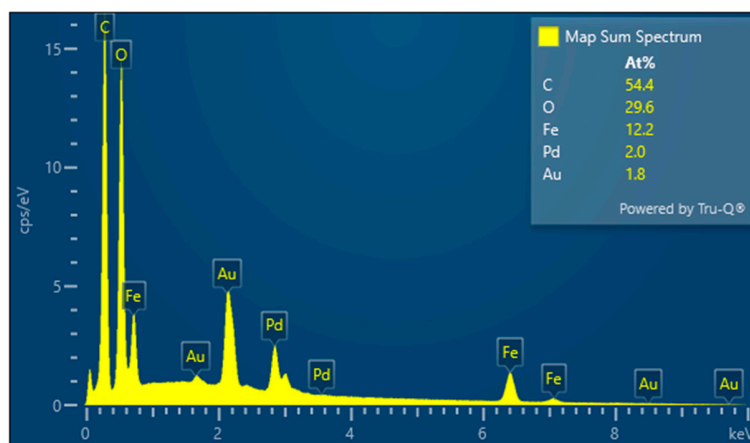

**Figure S1.** EDS spectrum and elemental composition of Fe-TA microstructures. (Note: Pd and Au come from the sample coating for SEM imaging).

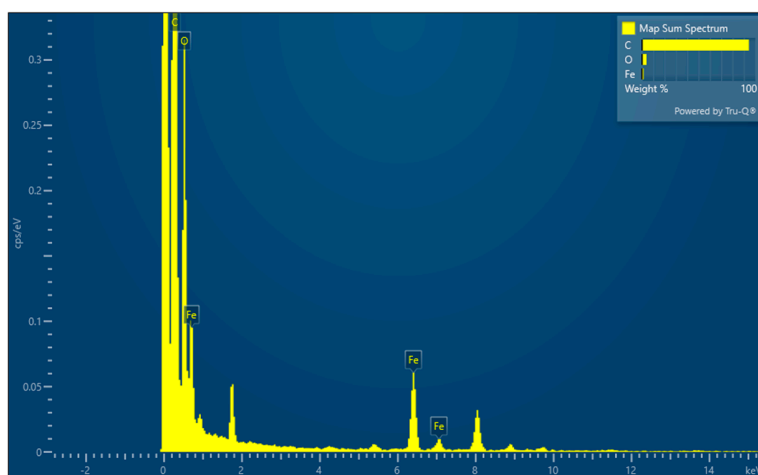

**Figure S2.** EDS spectrum of Fe-TA microstructures obtained HR-TEM using STEMEDS capability.

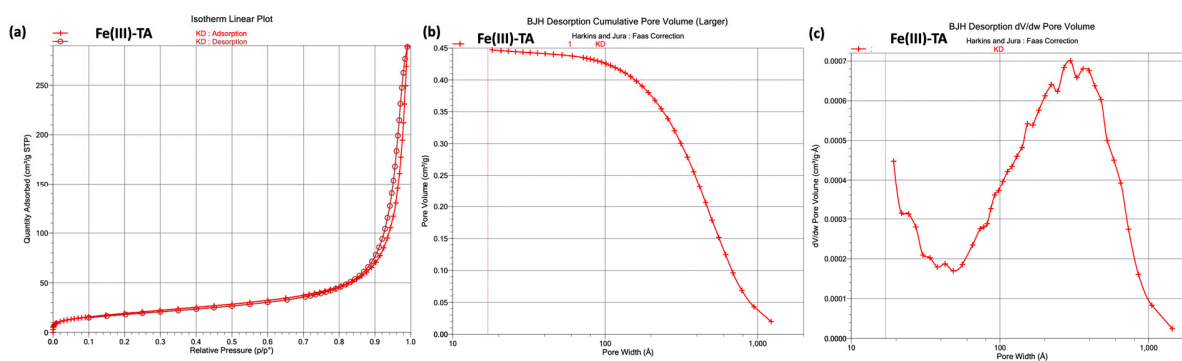

**Figure S3.** (a) N<sub>2</sub>-isotherm. (b) BJH desorption cumulative pore volume distribution. (c) BJH desorption dV/dw pore volume

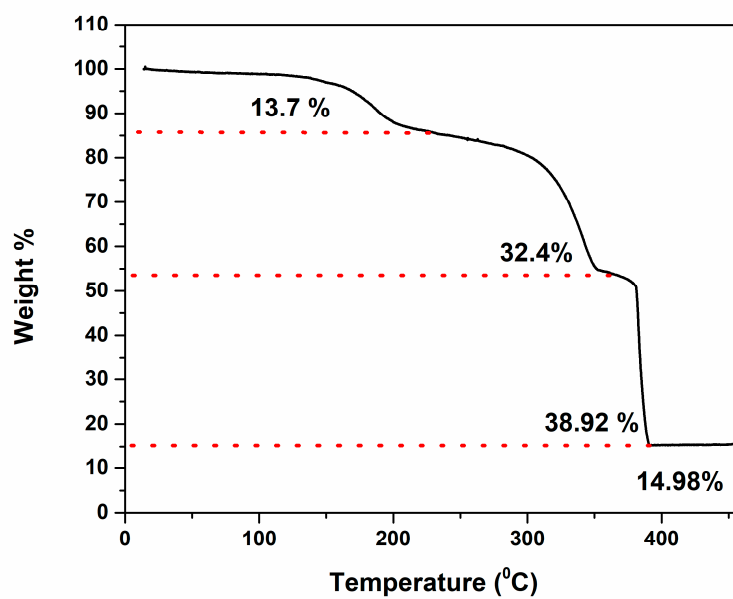

**Figure S4.** TGA curve for Fe(III)-TA.
